# Supplementary material for: Circular RNA SERPINE2 promotes development of glioblastoma by regulating the miR-361-3p/miR-324-5p/BCL2 signaling pathway
Source: PubMed Central journal article supplement — Mol Ther Oncolytics. 2021 Jul 29;22:483–94. doi: 10.1016/j.omto.2021.07.010 (PMC8433060; doi:10.1016/j.omto.2021.07.010), 2021-07-29

OMTO, Volume 22

## Supplemental information

**Circular RNA *SERPINE2* promotes development  
of glioblastoma by regulating the  
miR-361-3p/miR-324-5p/*BCL2* signaling pathway**

**Deheng Li, Liangdong Li, Xin Chen, Wentao Yang, and Yiqun Cao**

Supplementary Table 1. Sequences of qRT-PCR primers and siRNAs

|                    |                              |                         |
|--------------------|------------------------------|-------------------------|
| Primers of qRT-PCR | circSERPINE2 Forward (5'-3') | GTGCAGTGTGCCTGTCACTA    |
|                    | circSERPINE2 Reverse (5'-3') | GGCTGACGAATGTCTAAAAGGC  |
|                    | GAPDH Forward (5'-3')        | GGAGCGAGATCCCTCCAAAAT   |
|                    | GAPDH Reverse (5'-3')        | GGCTGTTGTCATACTTCTCATGG |
|                    | miR-324-5p Forward (5'-3')   | GCTATCACAGAGCATTTCAT    |
|                    | miR-324-5p Reverse (5'-3')   | TGCACCAAACACGACTTTTAACC |
|                    | miR-361-3p Forward (5'-3')   | ACACTCCAGCTGGGTCCCCCAG  |
|                    | miR-361-3p Reverse (5'-3')   | CTCAACTGGTGT CGTGGA     |
|                    | U6 Forward (5'-3')           | CTCGCTTCGGCAGCACA       |
|                    | U6 Reverse (5'-3')           | AACGCTTCACGAATTTGCGT    |
| siRNAs             | circSERPINE2 #1              | UCACAAUCUGAUUGAAAACCU   |
|                    | circSERPINE2 #2              | UCCAUUUACGCCGUAUCUCAU   |
|                    | circSERPINE2 #3              | UUUACCAACUCCAUUUACGCC   |
|                    | NC                           | TTCTCCGAACGTGTACGT      |

Supplementary Table 2. Somatic mutations of cancer-related genes in GB cell lines.

| Gene Symbol | Cell lines |            |            |            |
|-------------|------------|------------|------------|------------|
|             | A172       | U251       | U87        | SHG44      |
| PTEN        | Non-mutant | Mutant     | Non-mutant | Non-mutant |
| PIK3CA      | Non-mutant | Non-mutant | Non-mutant | Non-mutant |
| KRAS        | Non-mutant | Non-mutant | Non-mutant | Non-mutant |
| MTOR        | Non-mutant | Non-mutant | Non-mutant | Non-mutant |
| AKT1        | Non-mutant | Non-mutant | Non-mutant | Non-mutant |

**Supplementary Figure 1** The expression circSERPINE2, miR-324-5p and miR-361-3p. circSERPINE2 expression is markedly upregulated in GM cancer tissues compared to normal brain tissues detected by qRT-PCR(A). miR-324-5p and miR-361-3p are silencing by miR-324-5p inhibitor and miR-361-5p inhibitor respectively (B).

Supplementary figure 1

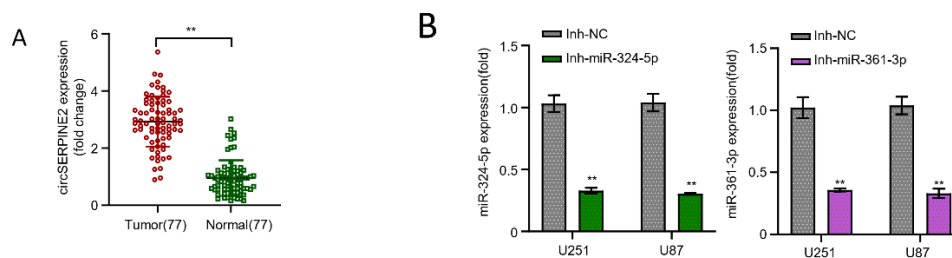

Supplement: mmc1.pdf [file mmc1.pdf]
